# Supplementary material for: Asymmetries in mother-infant behaviour in Barbary macaques (Macaca sylvanus)
Source: PeerJ. 2018 May 8;6:e4736. doi: 10.7717/peerj.4736 (PMC5947039; doi:10.7717/peerj.4736)
Supplement: Supplemental Information 1 — Frequencies of right and left hand use for food reaching are reported. [file peerj-06-4736-s001.xlsx]

## Sheet: Feeding
FOOD REACHING
Subject	M/I	R	L	LI
Budda	Mother	59	33	0.282609
Funny	Mother	63	169	-0.456897
Katrina	Mother	229	214	0.03386
Last	Mother	156	211	-0.149864
Mirror	Mother	188	74	0.435115
Vanda	Mother	251	164	0.209639
Violetta	Mother	179	150	0.0881459
Subject	M/I	R	L	LI
Budda's	Infant	37	25	0.193548
Funny's	Infant	11	8	0.157895
Katrina's	Infant	30	41	-0.15493
Last's	Infant	40	45	-0.0588235
Mirror's	Infant	21	22	-0.0232558
Vanda's	Infant	0	3	-1
Violetta's	Infant	39	46	-0.0823529
